# Supplementary material for: Dissecting the expression landscape of RNA-binding proteins in human cancers
Source: PubMed Central journal article supplement (PMC4053825; doi:10.1186/gb-2014-15-1-r14), 2014-01-10

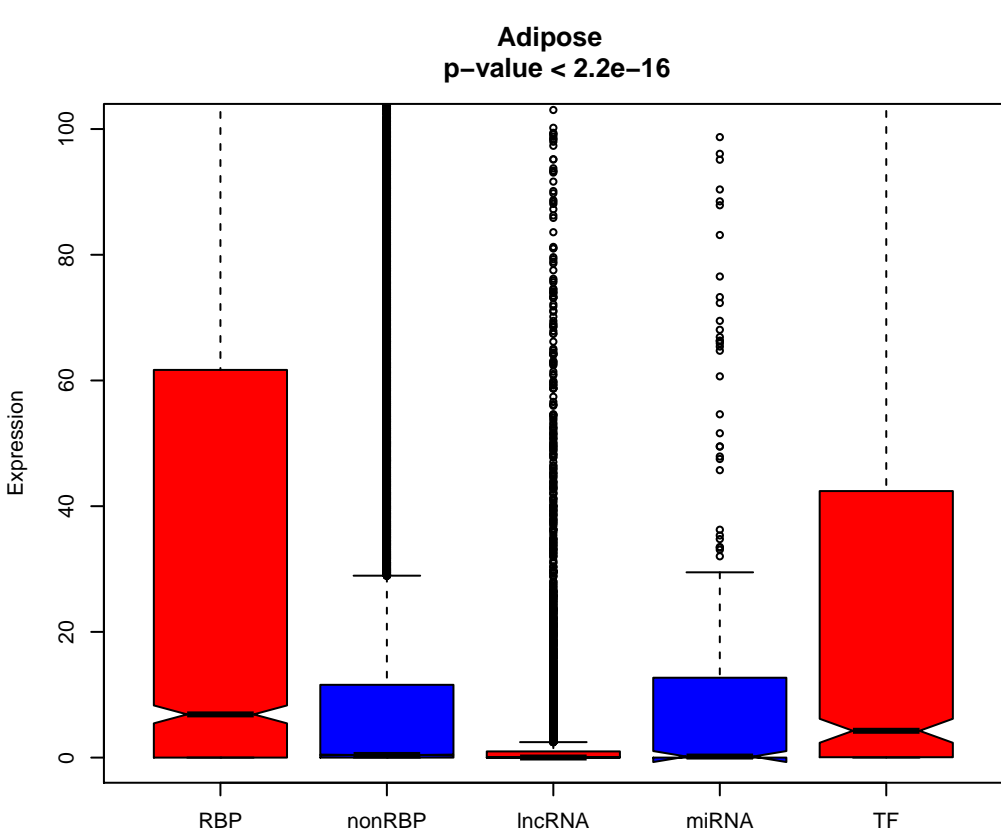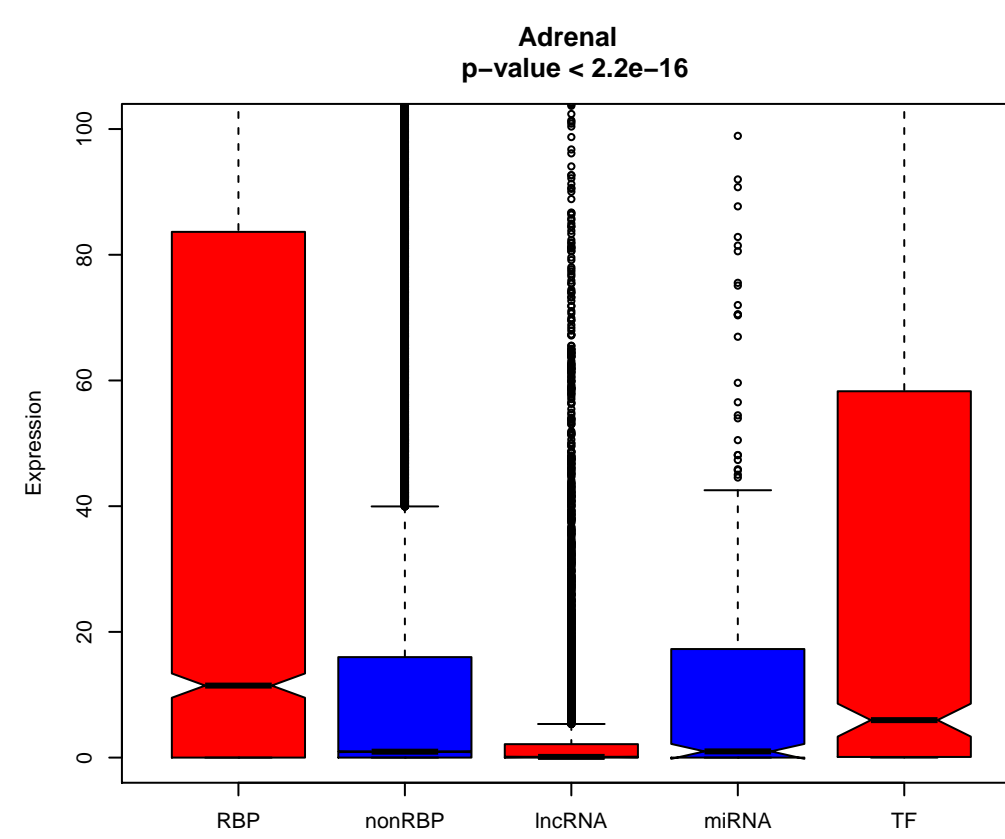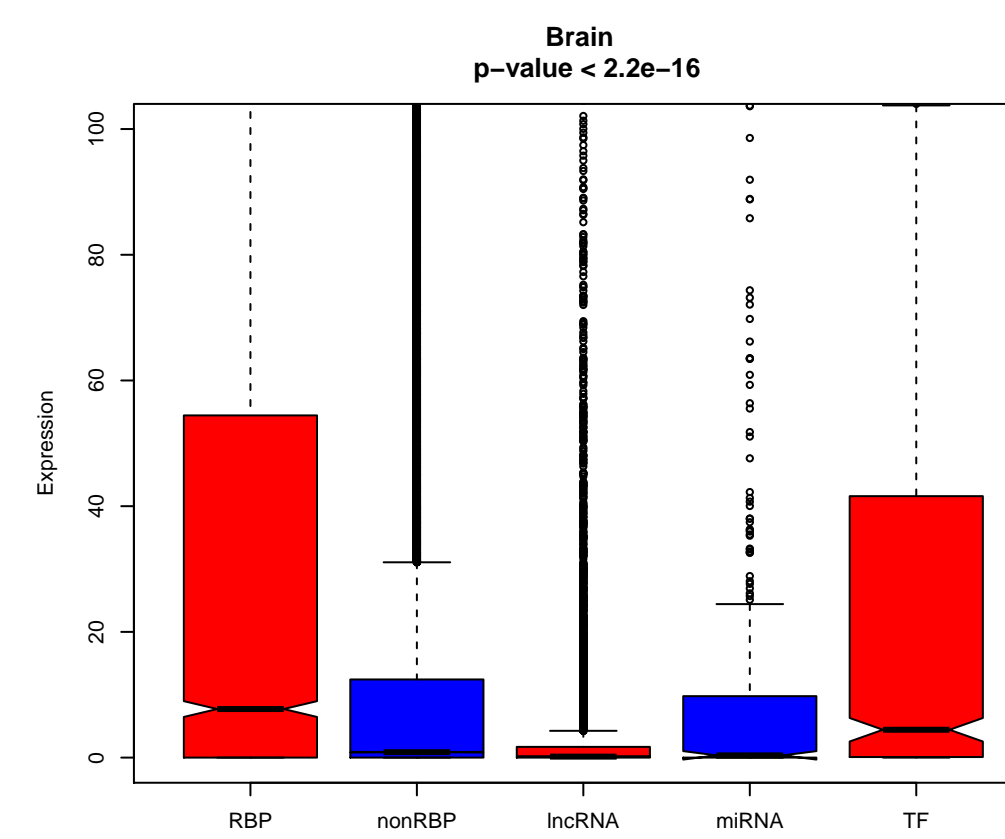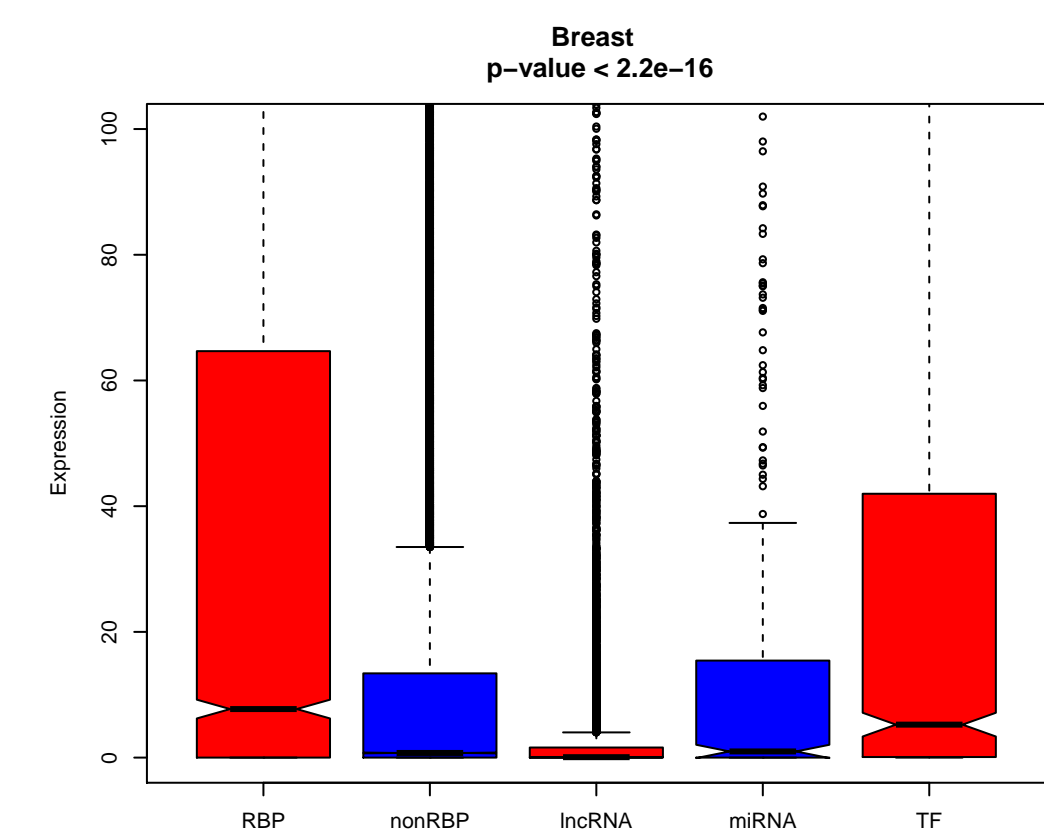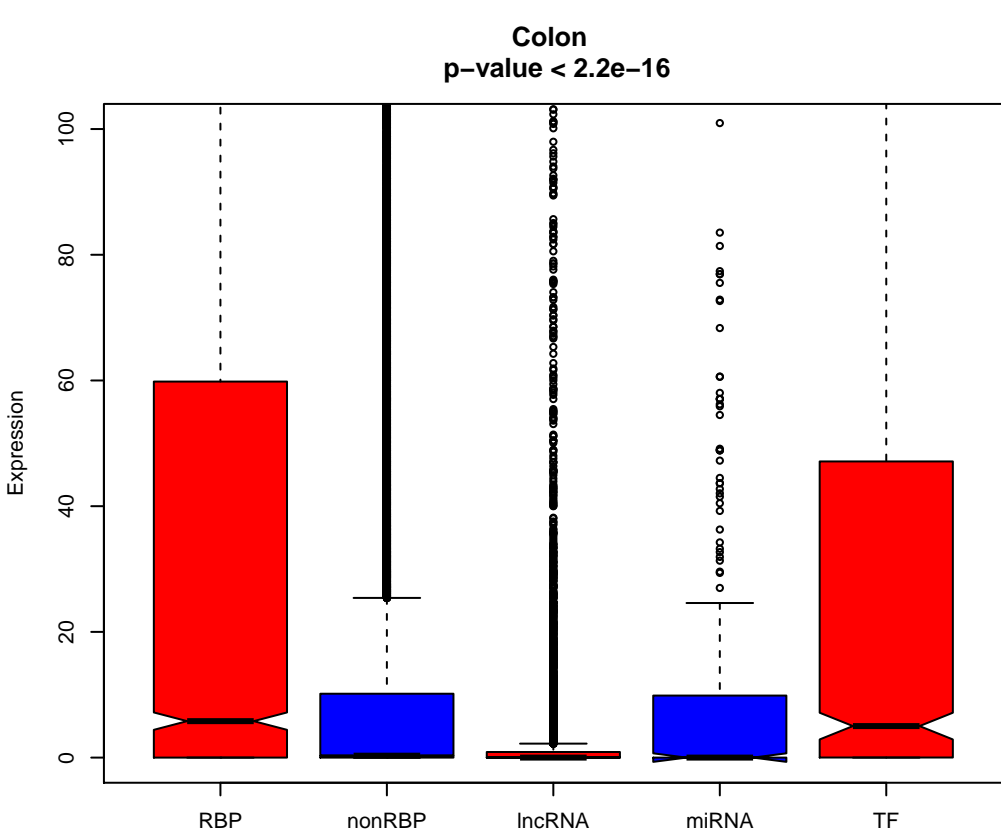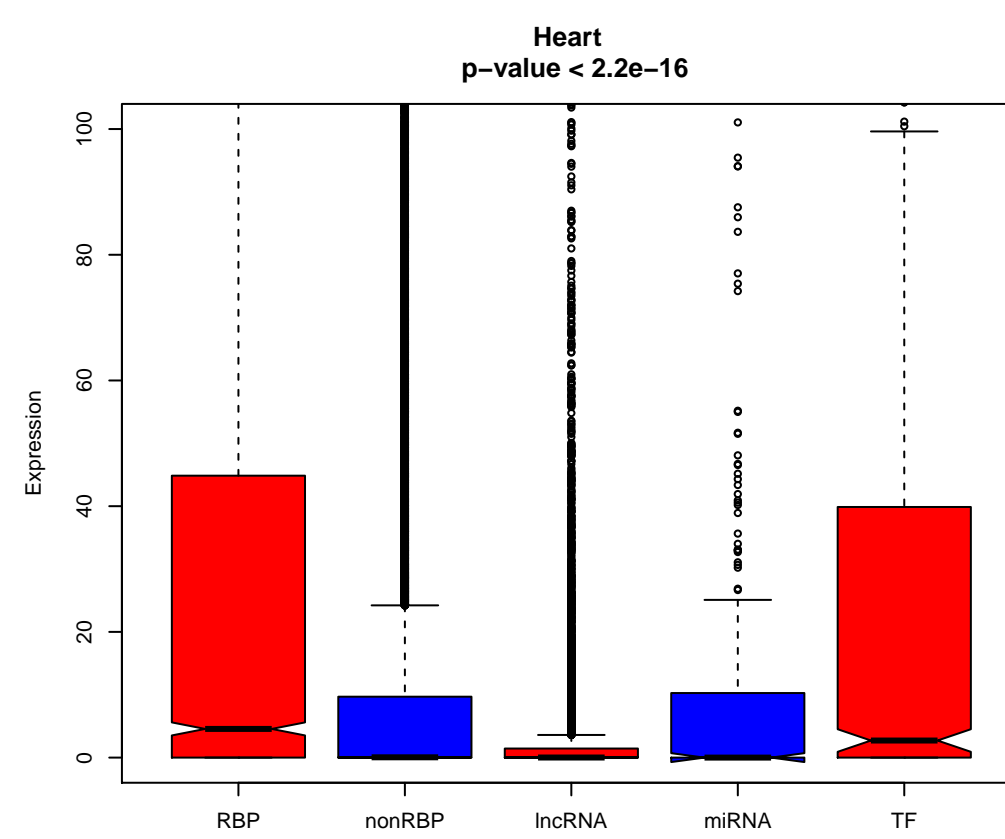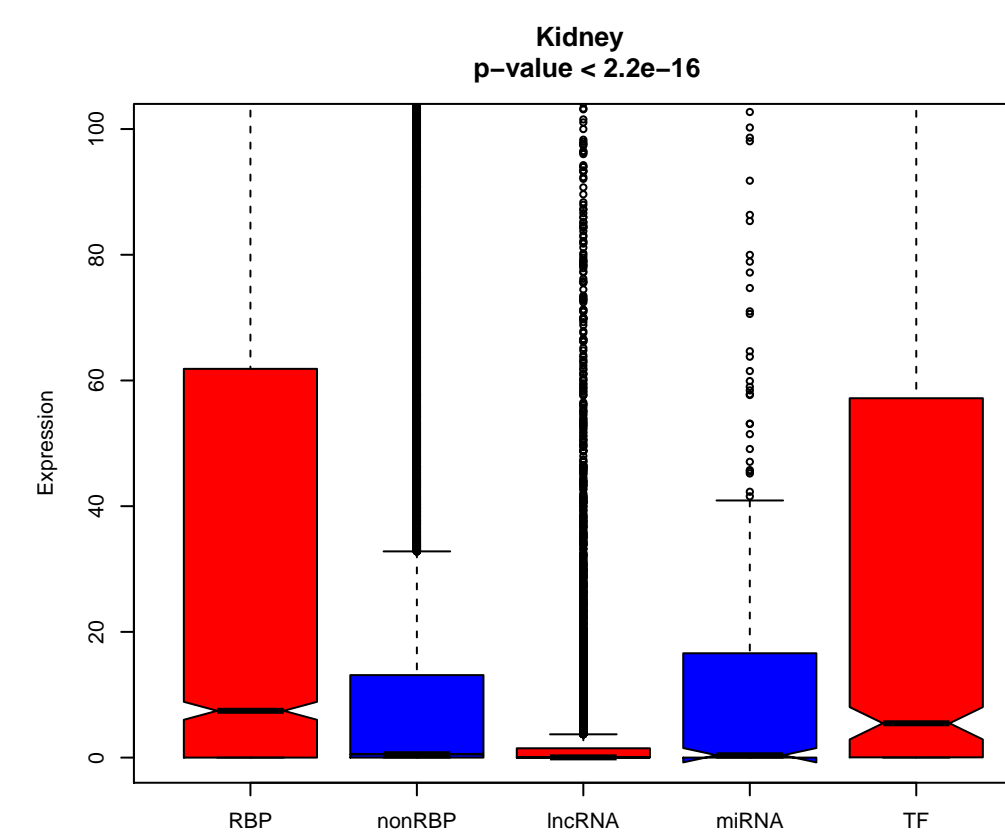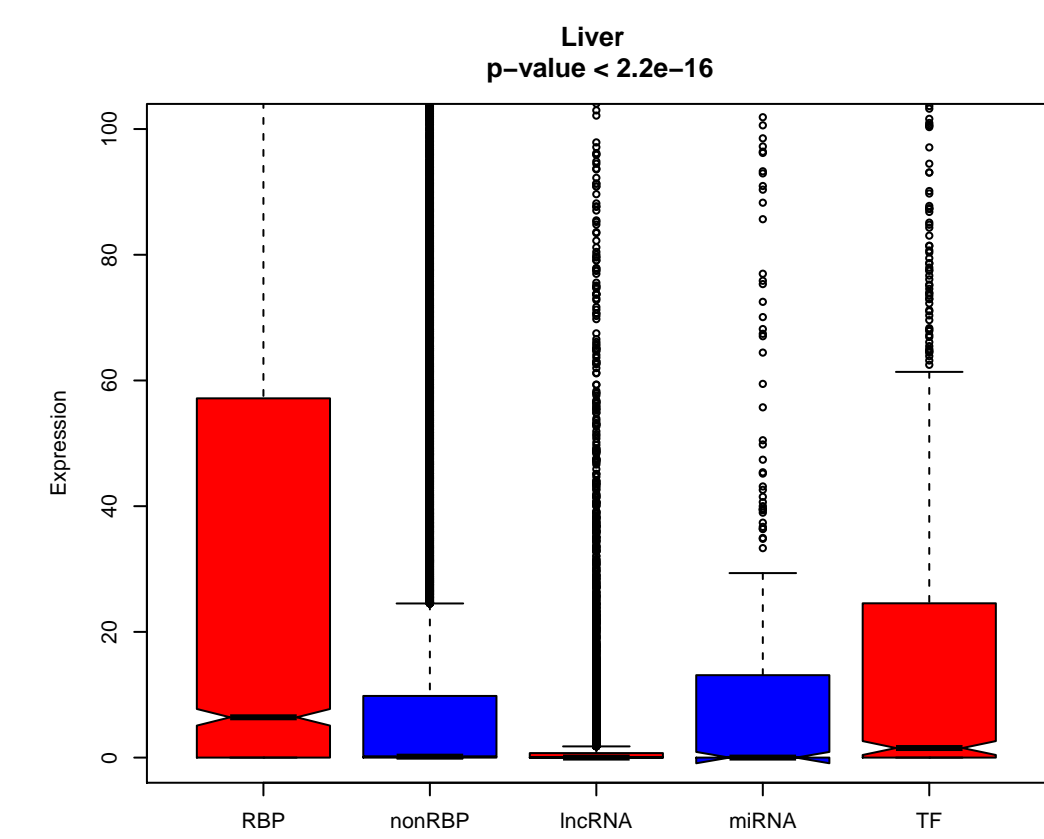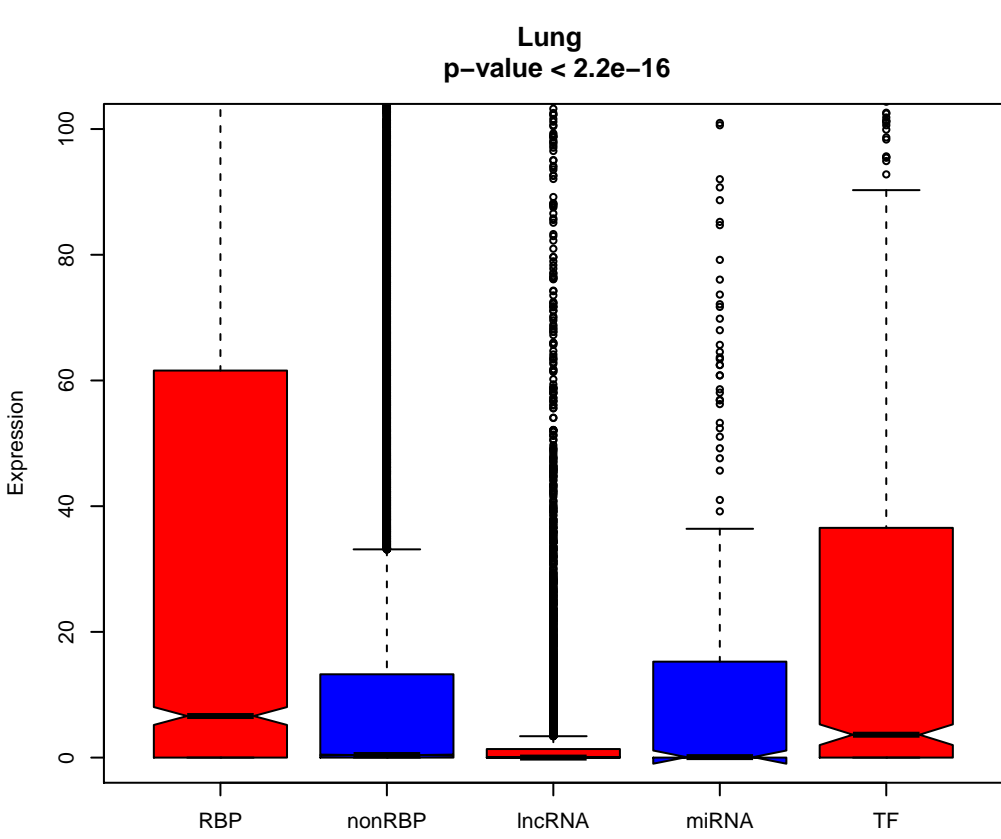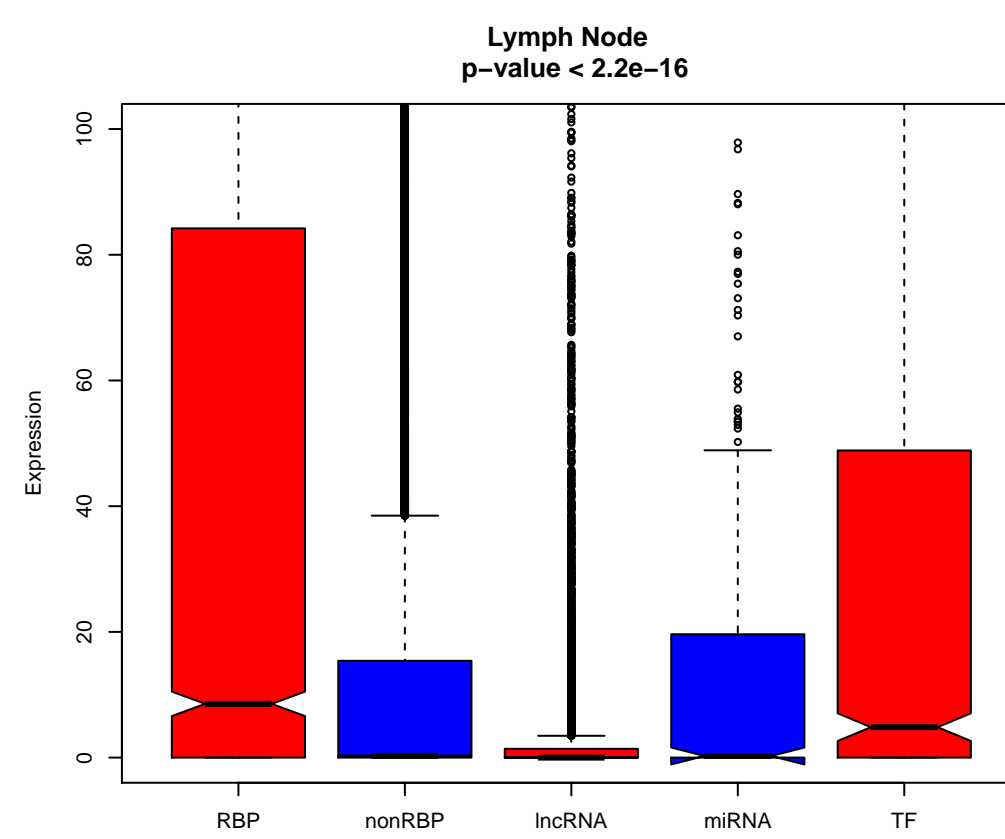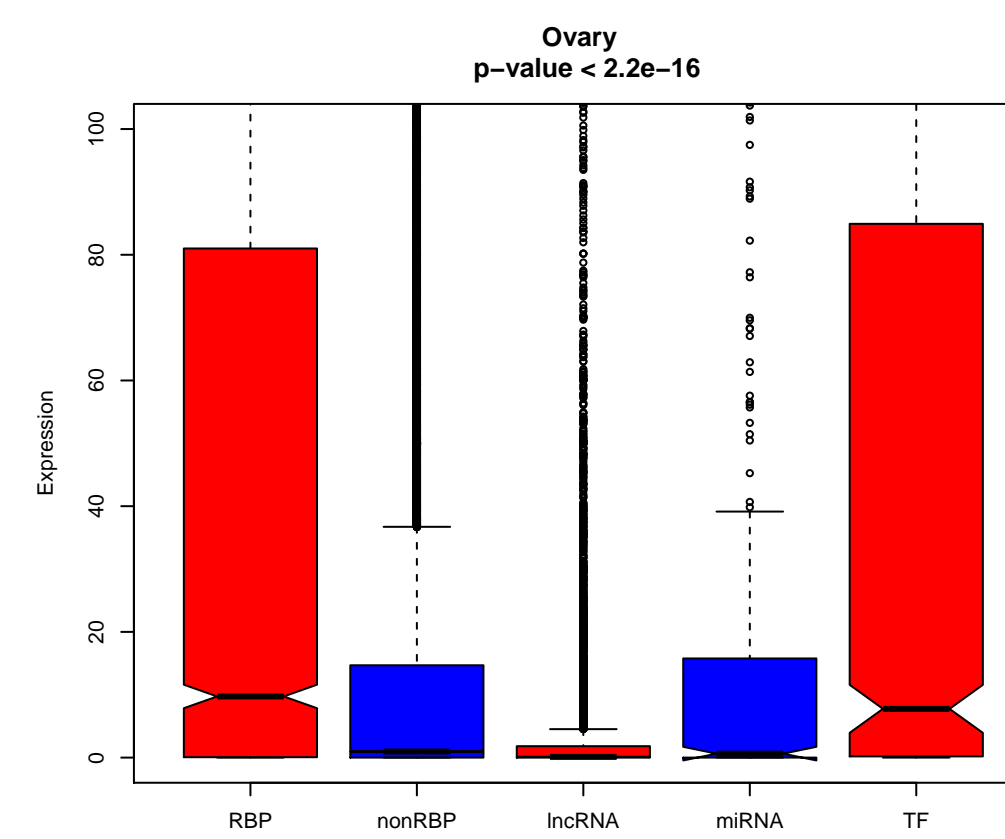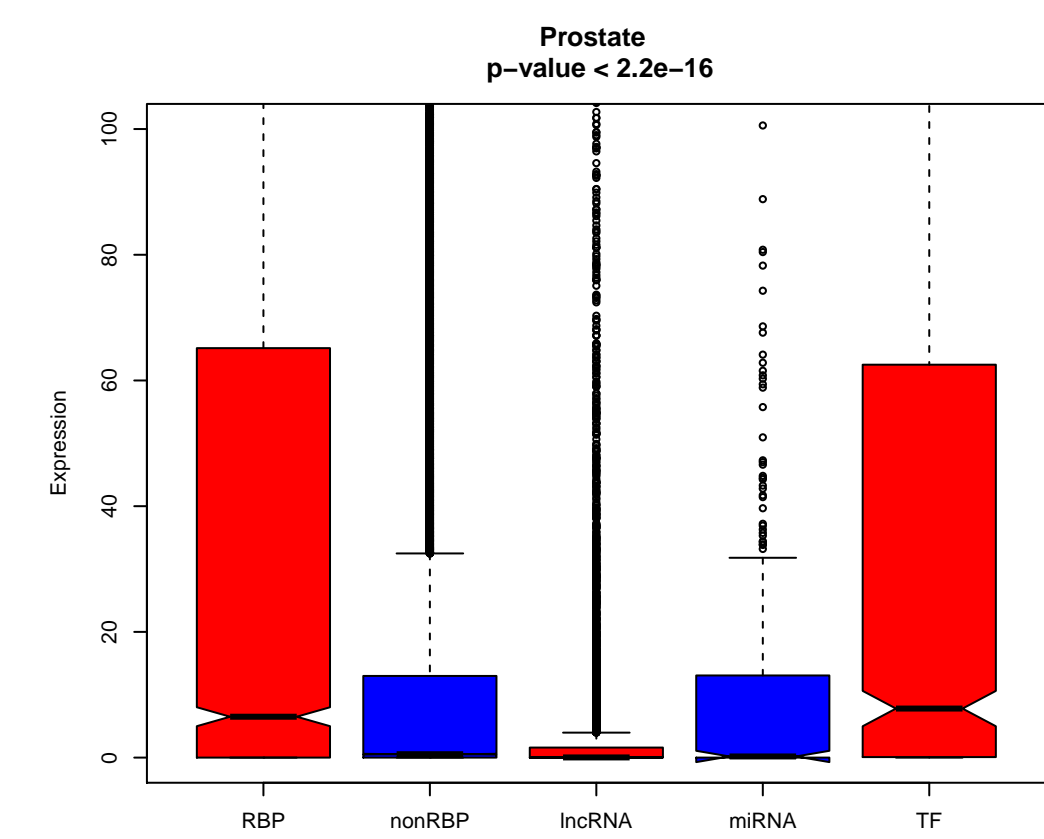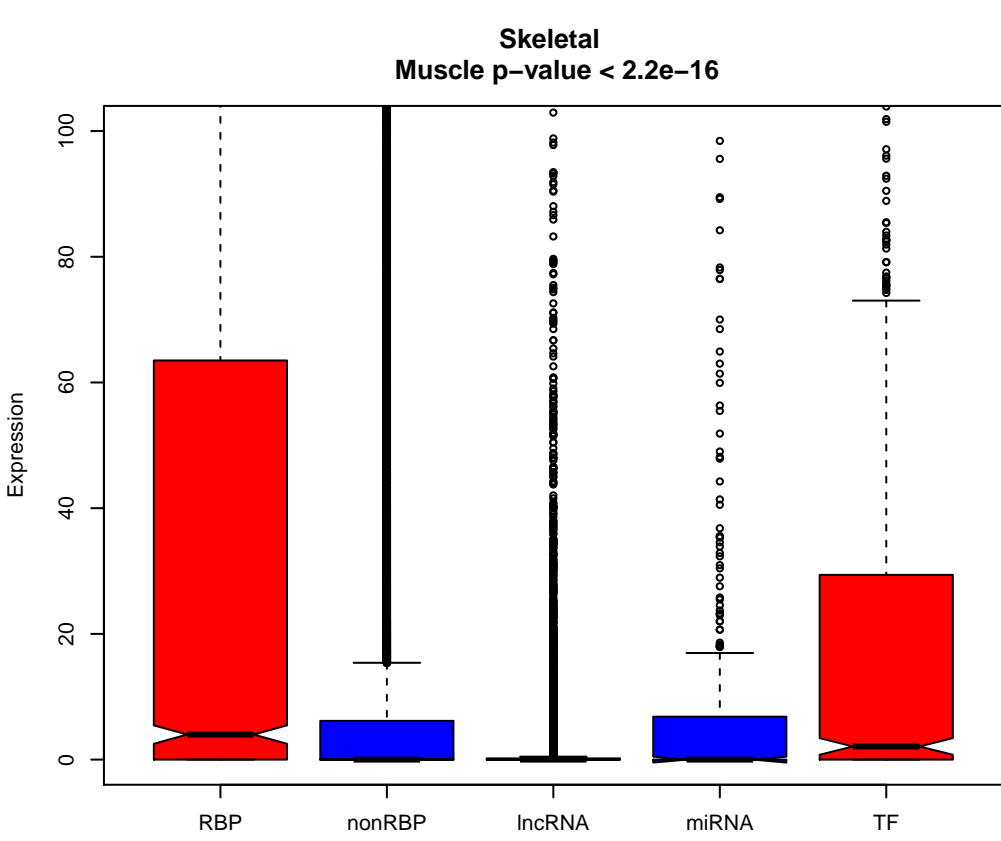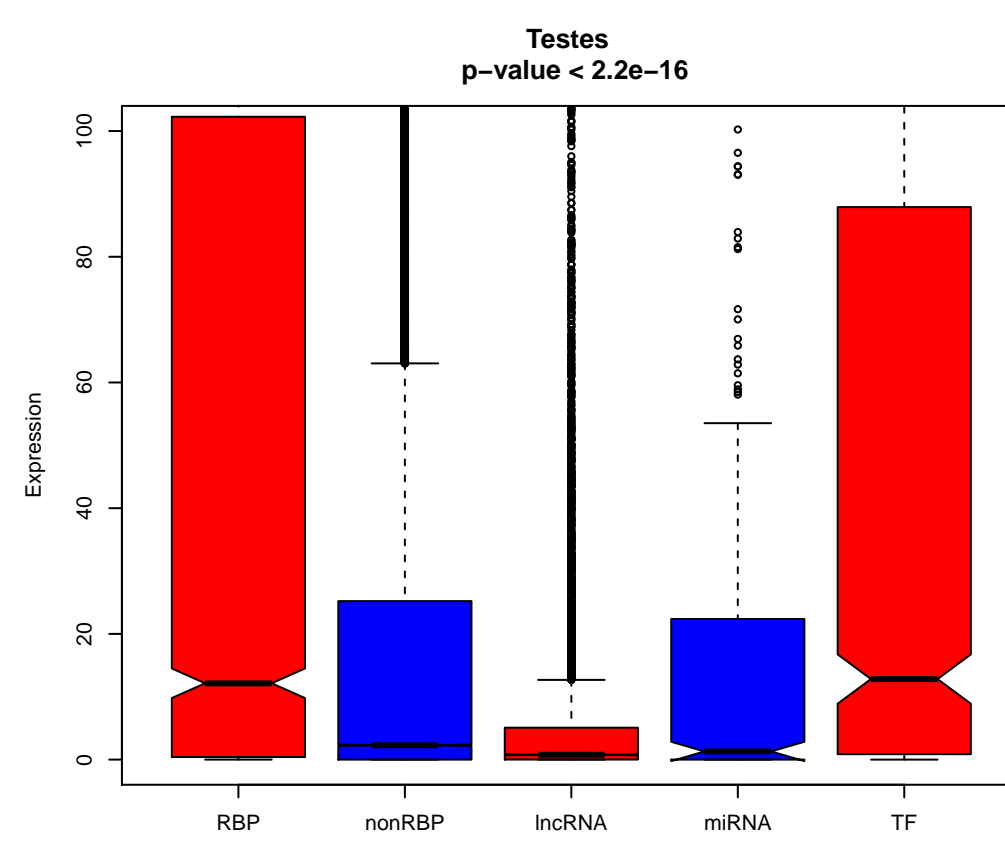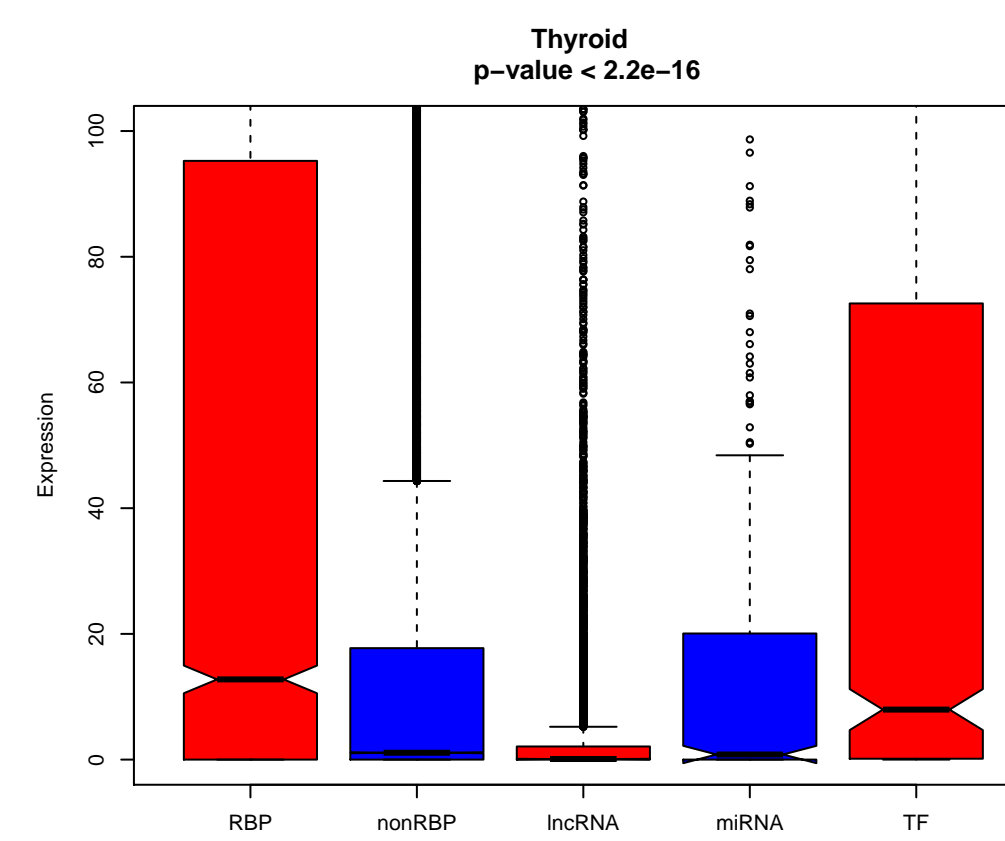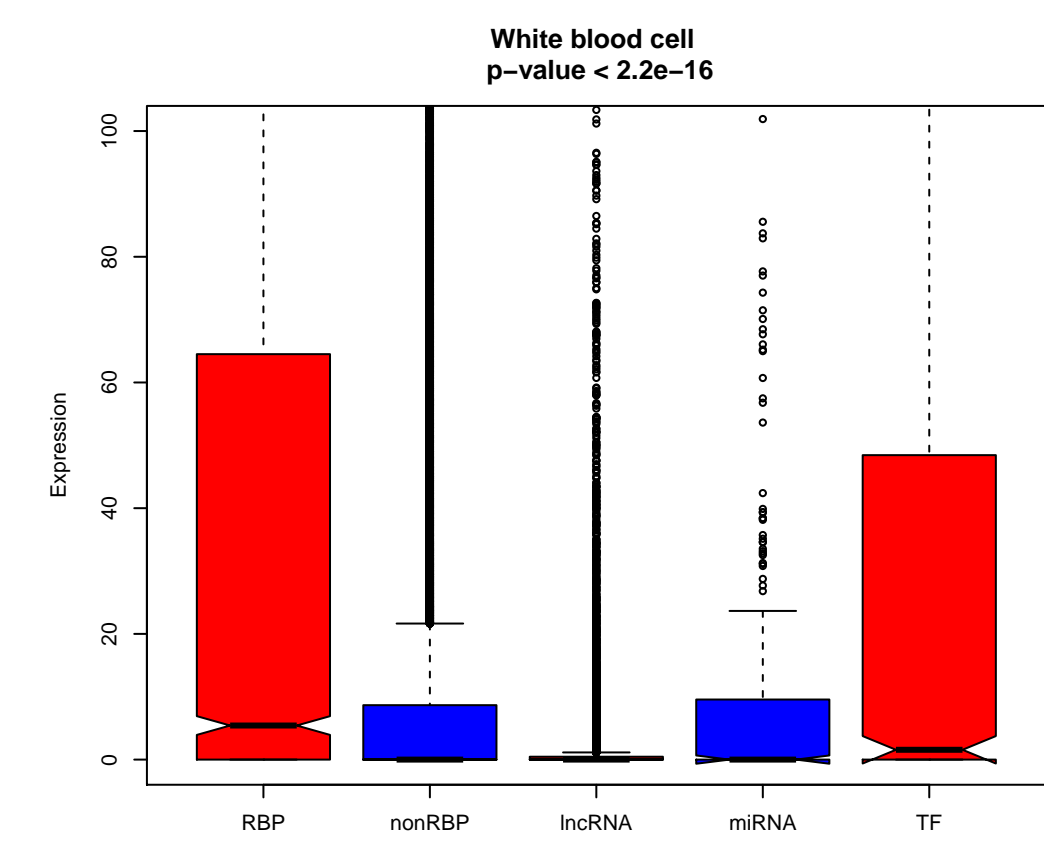

Supplement: gb-2014-15-1-r14-S1.pdf [file gb-2014-15-1-r14-S1.pdf]
