# Supplementary material for: Dissecting the expression landscape of RNA-binding proteins in human cancers
Source: PubMed Central journal article supplement (PMC4053825; doi:10.1186/gb-2014-15-1-r14), 2014-01-10

**A** Shortest path distributions

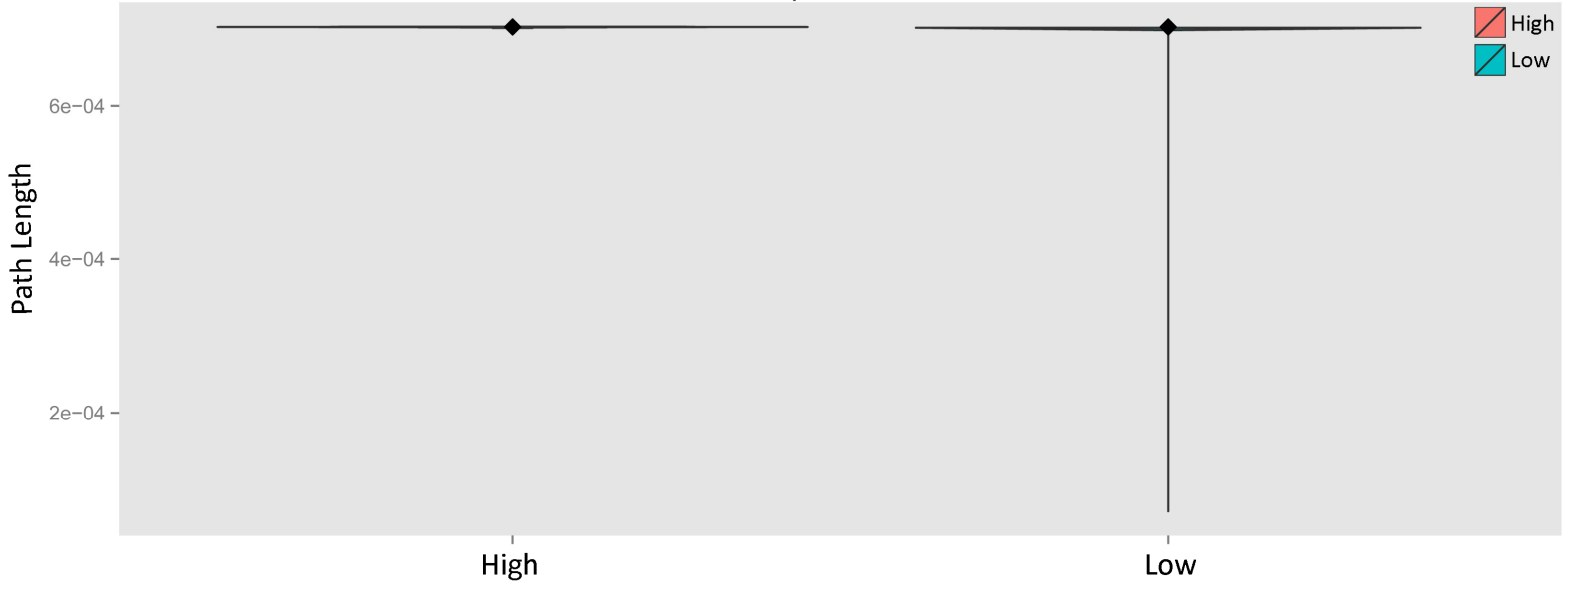

**B** Normalized degree distribution

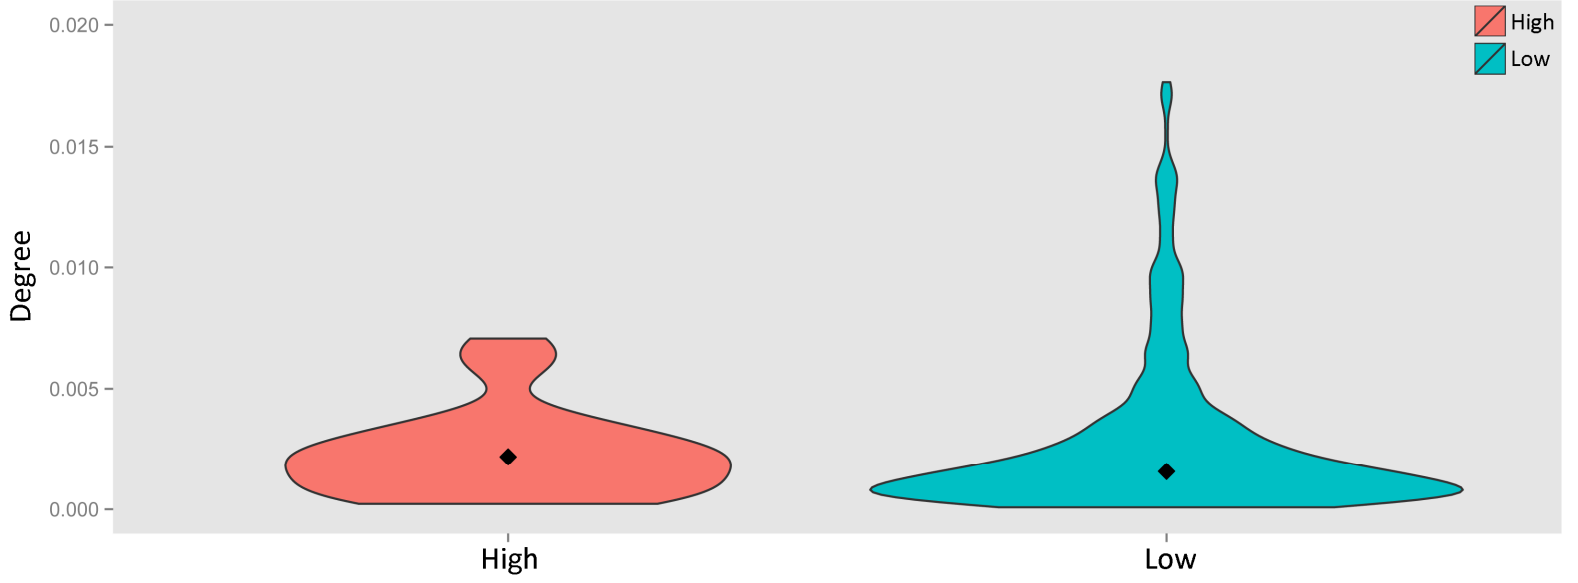

**C** Normalized Betweenness

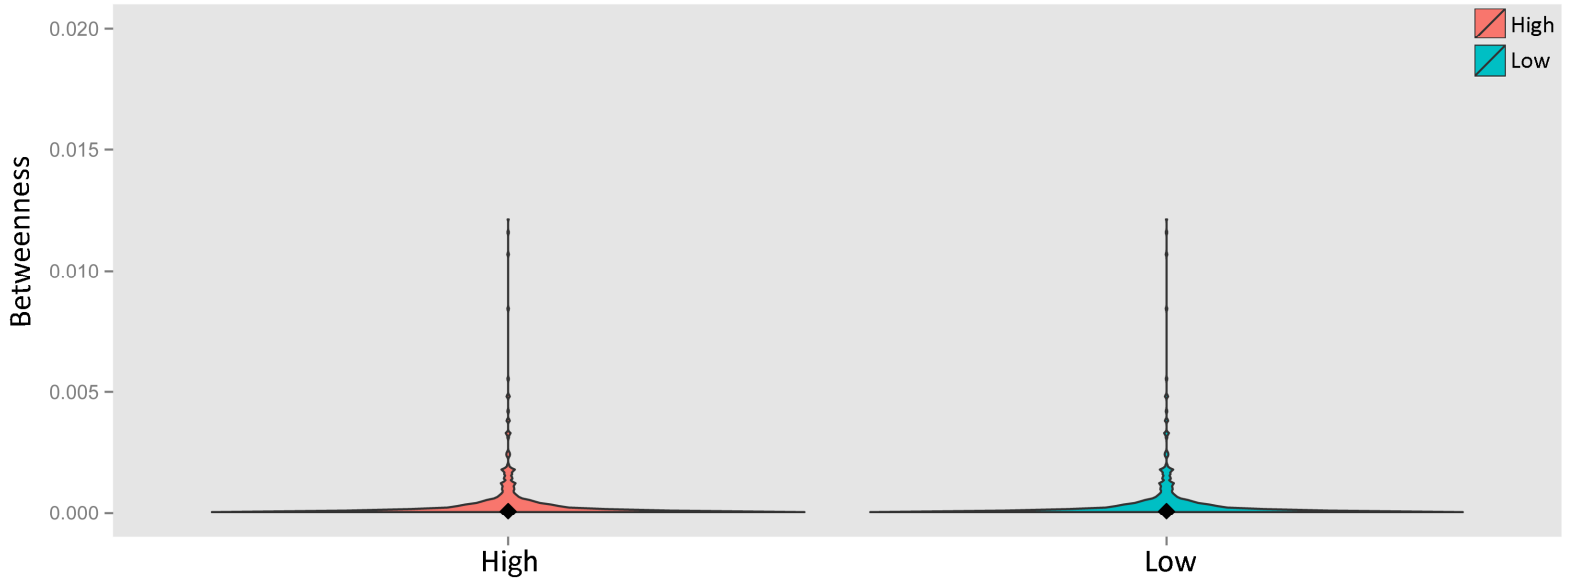

Supplement: gb-2014-15-1-r14-S5.pdf [file gb-2014-15-1-r14-S5.pdf]
